# Supplementary material for: Identifying long-term stable refugia for relict plant species in East Asia
Source: PubMed Central journal article supplement (PMC6203703; doi:10.1038/s41467-018-06837-3), 2018-10-26
Supplement: 41467_2018_6837_MOESM1_ESM.pdf [file 41467_2018_6837_MOESM1_ESM.pdf]

## **Supplementary Information**

**Tang et al. 2018.** Identifying long-term stable refugia for relict plant species in East Asia.

## Supplementary Note 1 Relict genera: their distribution in space and time before the LGM

This section presents mega/macro fossil records of the genera involved in space and time to provide a phytogeographic history of these genera.

The relict genera, both the endemic and those having disjunct distributions of fossil records, evidently had broad distribution ranges during the Paleogene and the Neogene Periods, and some of them even in the Cretaceous (Supplementary Figs. 5A and 5B). The relevant Triassic and Jurassic fossils, as represented by *Ginkgo*, were widely distributed around the world (Laurasia and Gondwana), with more occurrences being found in Eurasia (Supplementary Figs. 5A and 5B). East Asia, Europe and North America had much stronger floristic interrelationships in the Paleogene-Neogene and the Cretaceous than in later times. Among the 63 genera confirmed by fossil records endemic today to East Asia (Supplementary Table 1), 55 exhibit fossils in Asia, 49 in Europe, and 33 in North America. Among the 36 genera confirmed by fossil records with disjunct distributions (Supplementary Table 2), 34 have fossil records in Asia, 33 in Europe, and 31 in North America. Of the genera whose origins can be found in the Arcto-Tertiary or boreotropical flora, many dominated the Northern Hemisphere during the Paleogene and the Neogene. Most of the relict genera that are presently endemic to East Asia also occurred in North America and/or Europe before the Pleistocene (Supplementary Table 1)<sup>also 1</sup>. The present endemism was formed when some dispersal routes became discontinuous, such as the North Atlantic land bridge and areas along the Tethys Seaway in the Paleogene and the much colder and drier conditions precluding the use of the Bering land bridge by temperate floral elements by late Neogene time and for all plants due to glaciation in the Quaternary<sup>2,3</sup>.

Among the 63 endemic genera, a higher number of genera of deciduous broad-leaved woody plants first appeared in the Paleocene and especially in the Miocene in Asia, whereas in both Europe and North America most of the genera of this type of woody plants first appeared in the Eocene (Supplementary Figs. 6A–6C). Of the disjunct genera a higher number first appeared in the Eocene in Asia (especially deciduous broad-leaved taxa) and North America, while the disjunct genera mostly first appeared in the Oligo-Miocene in Europe (Supplementary Figs. 6D–6F). This is consistent with the geological history of Asia, Europe and North America. The mountain

ranges (e.g. the Himalayas in Asia, the Alps in Europe, the Rocky Mountains in North America) were all being uplifted starting from about the Paleocene/Eocene in Asia, about the Eocene in Europe, and about the Paleocene in North America. Most of them had become high mountains by/in the Miocene. The formation of the Asian monsoons has been attributed to the uplift of the Himalayas and Tibetan plateau<sup>4,5</sup> as well as changes in the land-sea distribution<sup>6</sup>. The uplift has obstructed humid air currents from going deep into northern China. Southern, southwestern and southeastern China have enhanced moisture from sea breezes. Thus subtropical China has been suitable for moisture-requiring relict plant species.

Many species of the relict genera became extinct in Europe and North America as tropical/sub-tropical environments there became temperate. The extinction of endemic taxa peaked in the Eocene (e.g. *Cryptomeria*, *Corylopsis*, *Diplopanax*, *Toricellia*) and Miocene (e.g. *Cathaya*, *Cephalotaxus*, *Cunninghamia*, *Eucommia*, *Ginkgo*, *Glyptostrobus*, *Pseudolarix*) in North America, possibly caused by terminal Eocene and late Miocene climatic deterioration, while extinction occurred mainly in the Mio-Pliocene (e.g. including the taxa just mentioned above, and additionally e.g. *Nothotsuga*, *Phellodendron*, *Taiwania*) in Europe (Supplementary Figs. 6G–6J), where the oceanic climate with humid conditions continued until the middle Pliocene<sup>7,8</sup>.

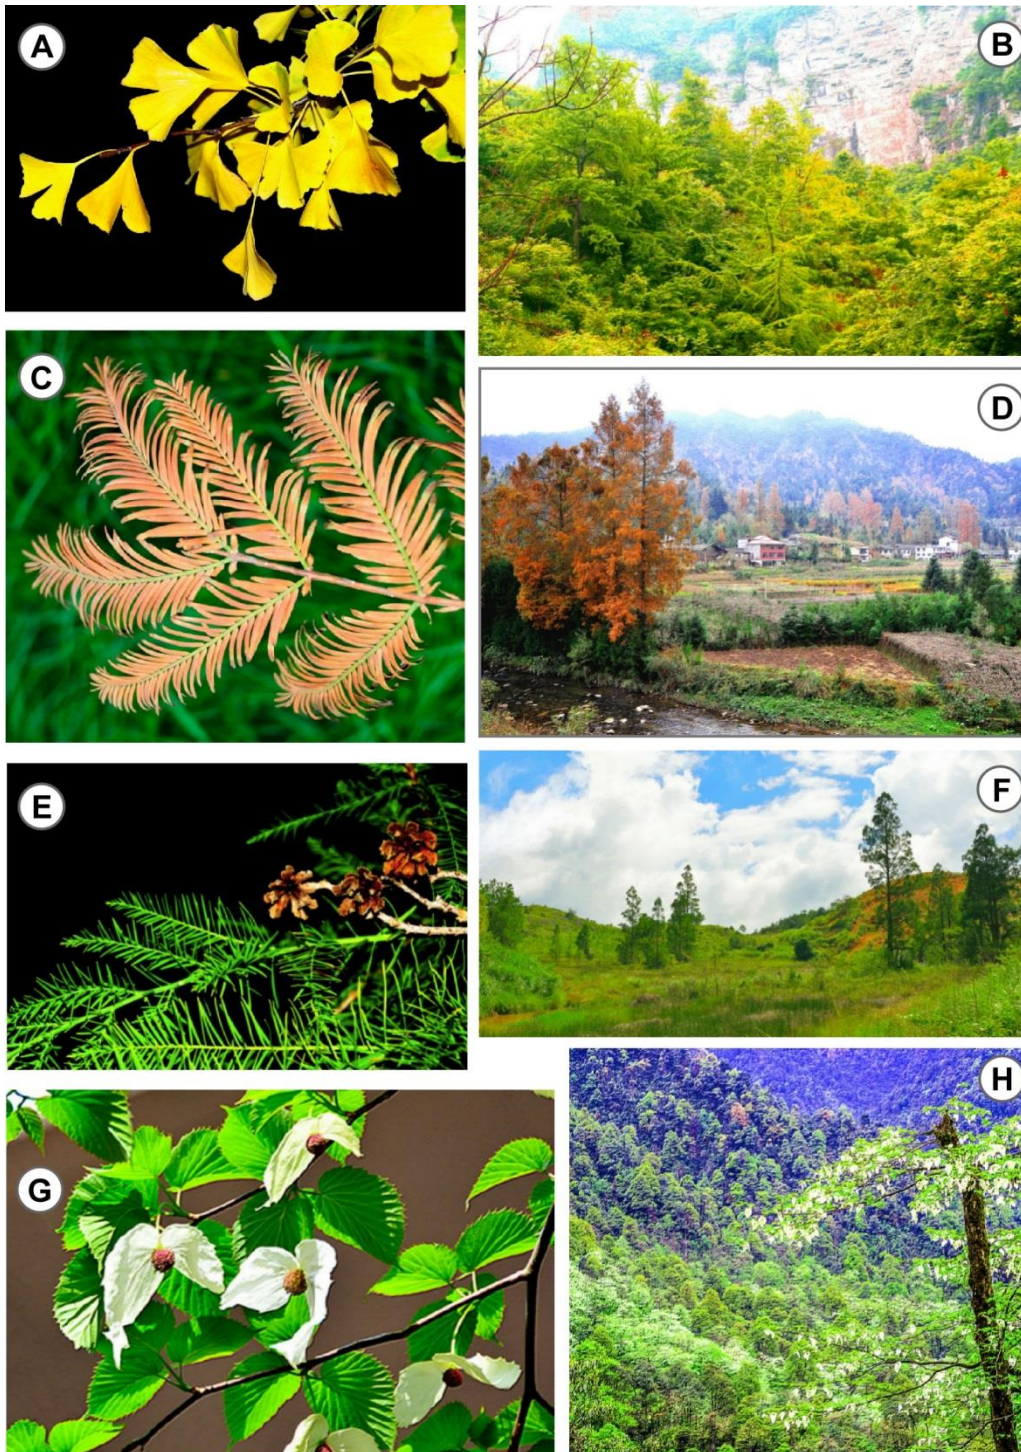

**Supplementary Fig. 1 Symbolic relict species of East Asia.** (A) Foliage of *Ginkgo biloba*. (B) A wild *G. biloba* forest in Yanjiagou, Nanchuan of Chongqing Municipality, southwestern China. (C) Foliage of *Metasequoia glyptostroboides*. (D) A wild *M. glyptostroboides* forest in the Shuisha Valley, Zhonglu, Lichuan, south-central China. (E) Foliage and seed cones of *Glyptostrobus pensilis*. (F) A wild *G. pensilis* swamp community in Nanping, Fujian, southeastern China. (G) Inflorescences of *Davidia involucrata*. (H) A *D. involucrata* forest in Longcanggou, Sichuan, southwestern China.

Photographs: (A), (B), (C), (E), (F) & (G) by Cindy Q. Tang; (D) by Yongchuan Yang; (H) by Shi-Liu Wang

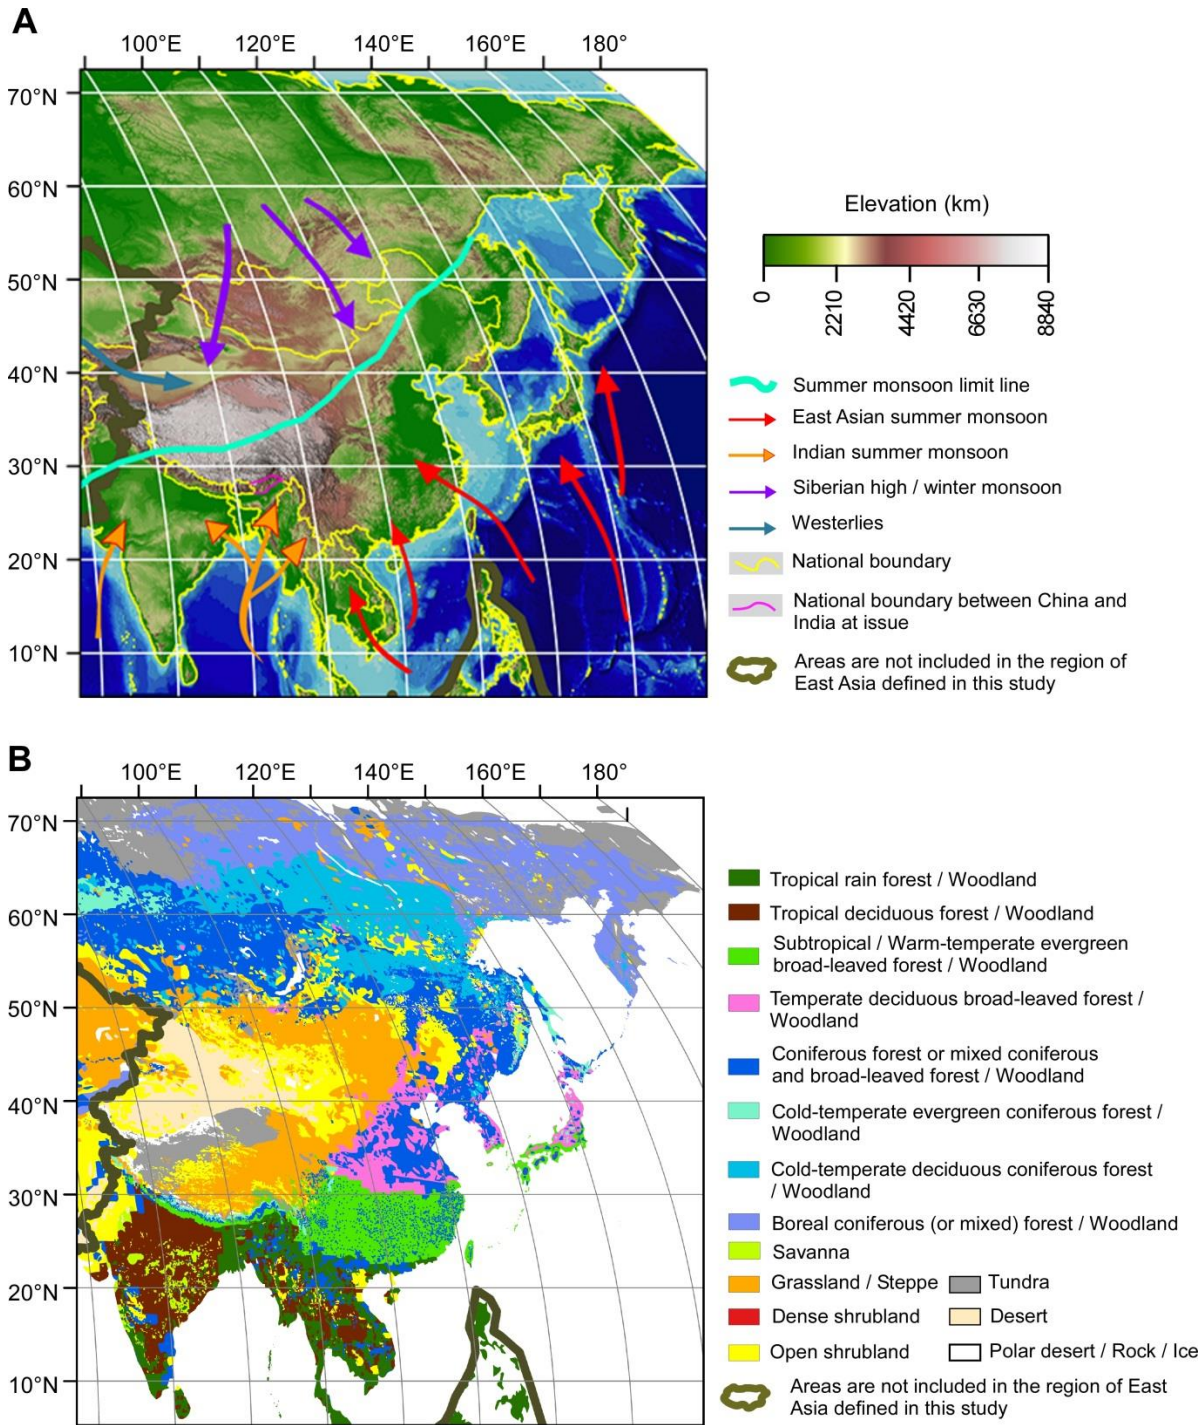

**Supplementary Fig. 2 Land, climate and vegetation of East Asia.** (A) Topography and climate system. The summer monsoon limit line adapted from Chen et al.<sup>9</sup>, showing the approximate extent of modern summer monsoon precipitation. (B) Potential vegetation types of East Asia (agricultural land, buildings, etc. are not taken into account) revised from Ramankutty and Foley<sup>10</sup>. Woodland represents undefined woody-mixed communities. Maps were generated using the software ArcGIS v. 10.5 (ESRI, Redlands, CA, USA) and modified using Canvas 12 (ACD Systems of America, Inc., Seattle, WA, USA). Map layers were obtained from site [www.gadm.org](http://www.gadm.org).

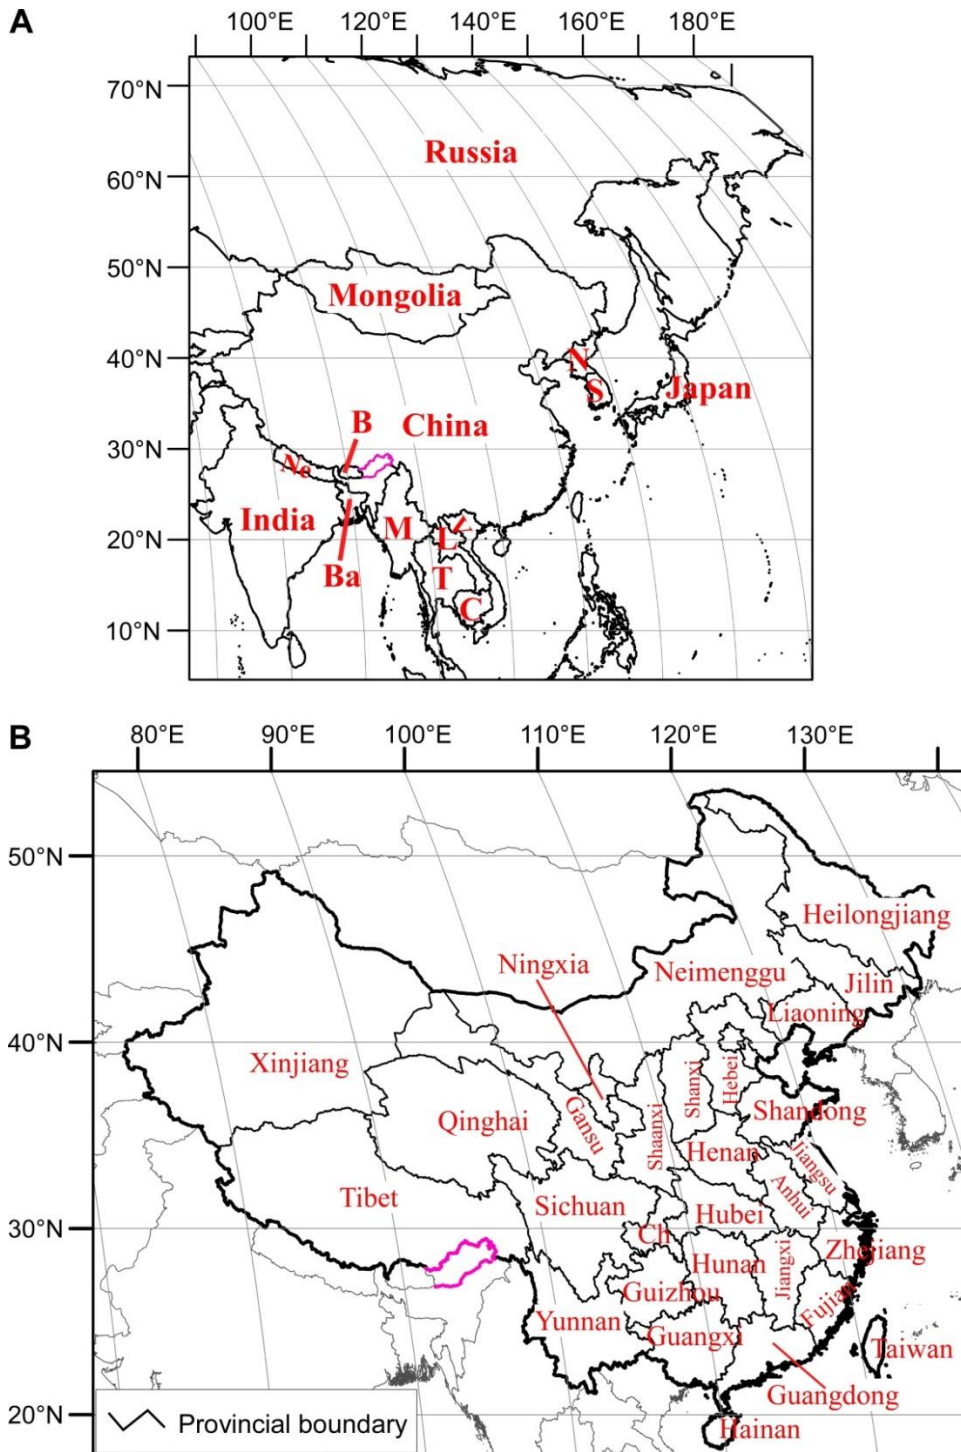

**Supplementary Fig. 3 East Asia and provinces of China.** (A) Countries of East Asia defined in this study. B=Bhutan; Ne=Nepal; Ba=Bangladesh; M=Myanmar; L=Laos; T=Thailand; C=Cambodia; V=Vietnam; N=North Korea; S=South Korea. (B) Provinces of China. Ch = Chongqing. Purple lines: national boundaries between China and India at issue. Maps were generated using the software ArcGIS v. 10.5 (ESRI, Redlands, CA, USA) and modified using Canvas 12 (ACD Systems of America, Inc., Seattle, WA, USA). Map layers were obtained from site [www.gadm.org](http://www.gadm.org).

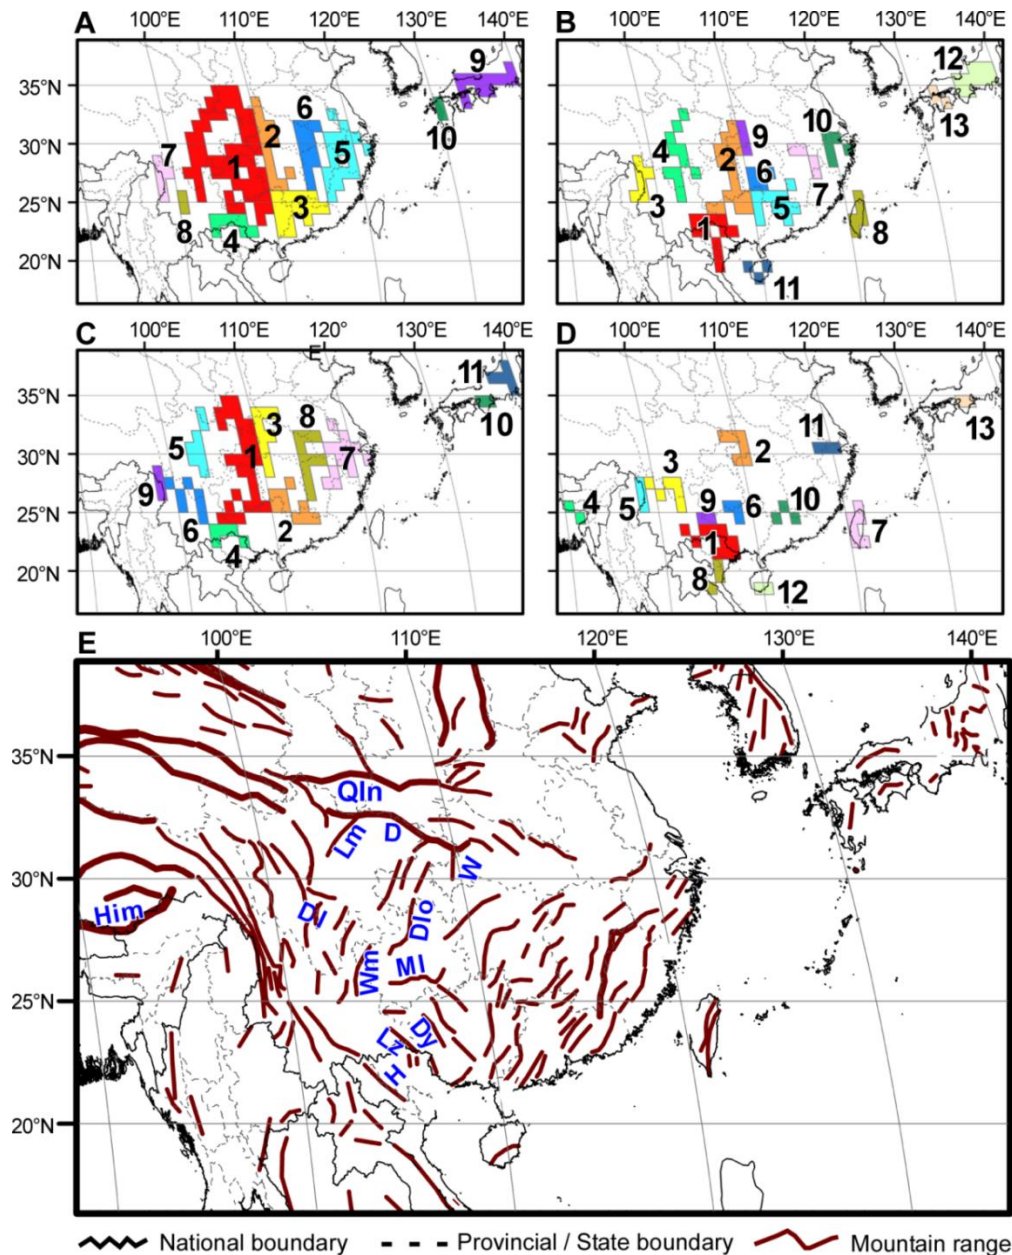

**Supplementary Fig. 4 Core areas of relict species richness and rarity-weighted richness (RWR) in East Asian mountain systems.** (A) Core areas of relict species richness of endemic genera. (B) Core areas of relict species rarity-weighted richness of endemic genera. (C) Core areas of relict species richness of disjunct genera. (D) Core areas of relict species rarity-weighted richness of disjunct genera. (E) Major mountain ranges of East Asia. Only the names of mountain ranges appeared in the main text are shown. In (A)–(D), a polygon represents a core area and the numbers from 1 to 13 are the ranks of relict species richness and RWR following the order from high to low among the core areas corresponding to Supplementary Tables 3–6. Abbreviations: D: Daba Mts; Dl: Daliang Mts; Dlo: Dalou Mts; Dy: Duyang Mts; H: Hoang Lien Son Mts; Him: Himalayas Mts; Lm: Longmen Mts; Lz: Liuzhao Mts; MI: Miaoling Mts; Qln: Qinling Mts; W: Wu Mts; Wm: Wumeng Mts. For the national boundary between China and India, please see Supplementary Fig. 2A and Methods. Maps were generated using the software ArcGIS v. 10.5 (ESRI, Redlands, CA, USA) and modified using Canvas 12 (ACD Systems of America, Inc., Seattle, WA, USA). Map layers were obtained from site [www.gadm.org](http://www.gadm.org).

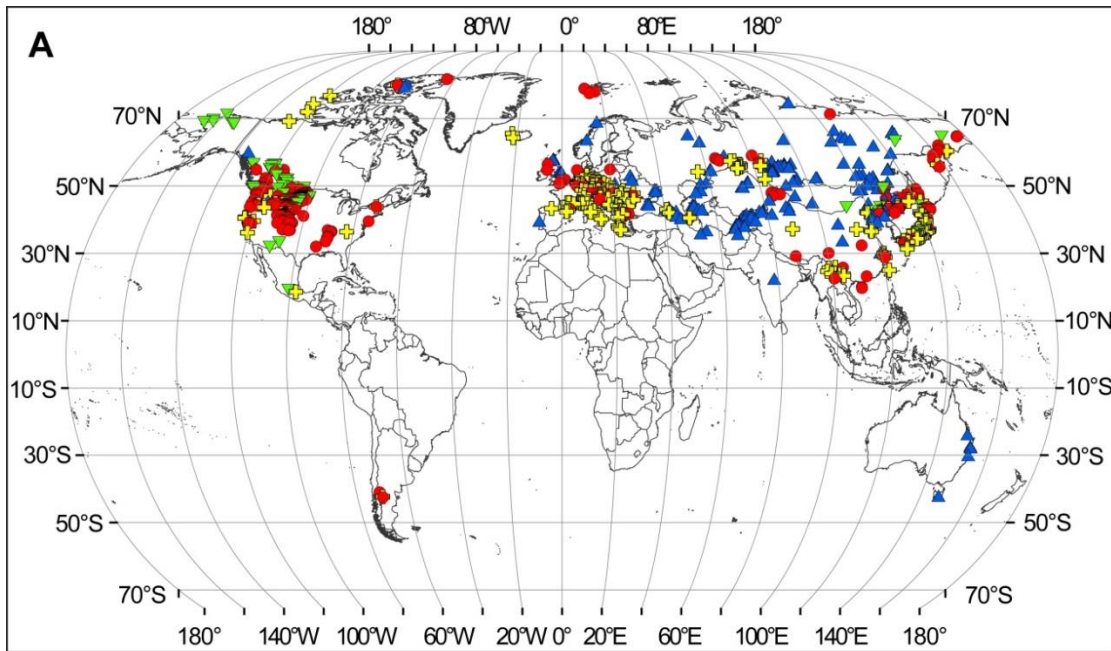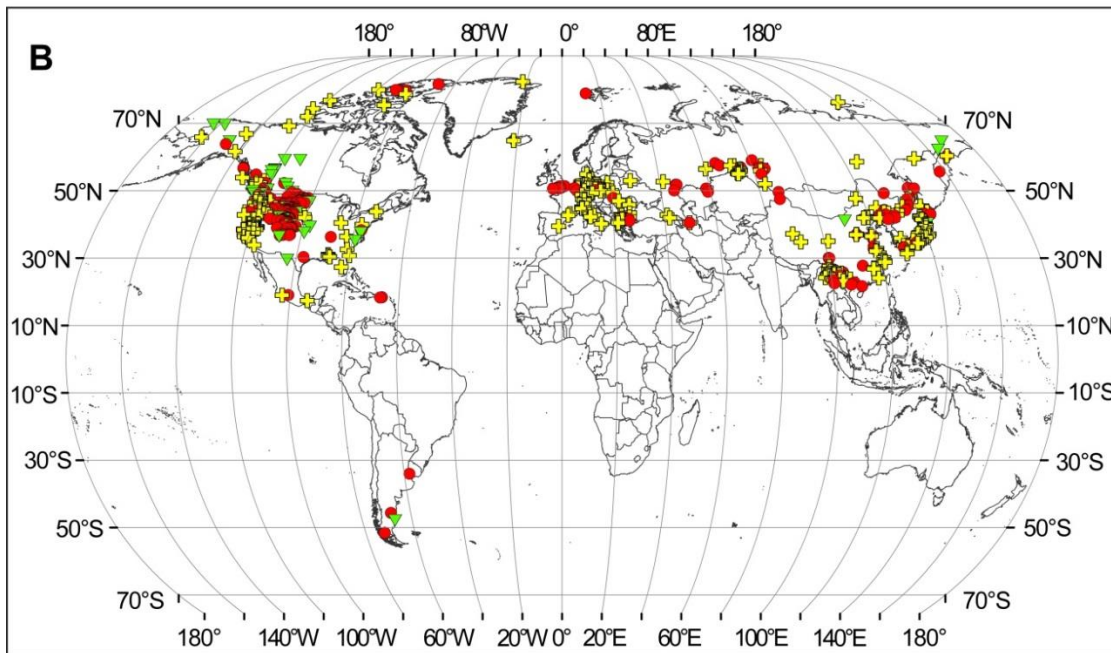

▲ Triassic     ▼ Cretaceous     ● Paleogene (Paleocene, Eocene and Oligocene)     + Neogene (Miocene and Pliocene)

**Supplementary Fig. 5 Historic (prior to the Pleistocene) distribution of the relict species in space and time.** (A) Relict species of genera endemic to East Asia. (B) Relict species of genera having disjunct distributions between East Asia and other parts of the world. For the national boundary between China and India, please see Supplementary Fig. 2A and Methods. Maps were generated using the software ArcGIS v. 10.5 (ESRI, Redlands, CA, USA) and modified using Canvas 12 (ACD Systems of America, Inc., Seattle, WA, USA). Map layers were obtained from site [www.gadm.org](http://www.gadm.org).



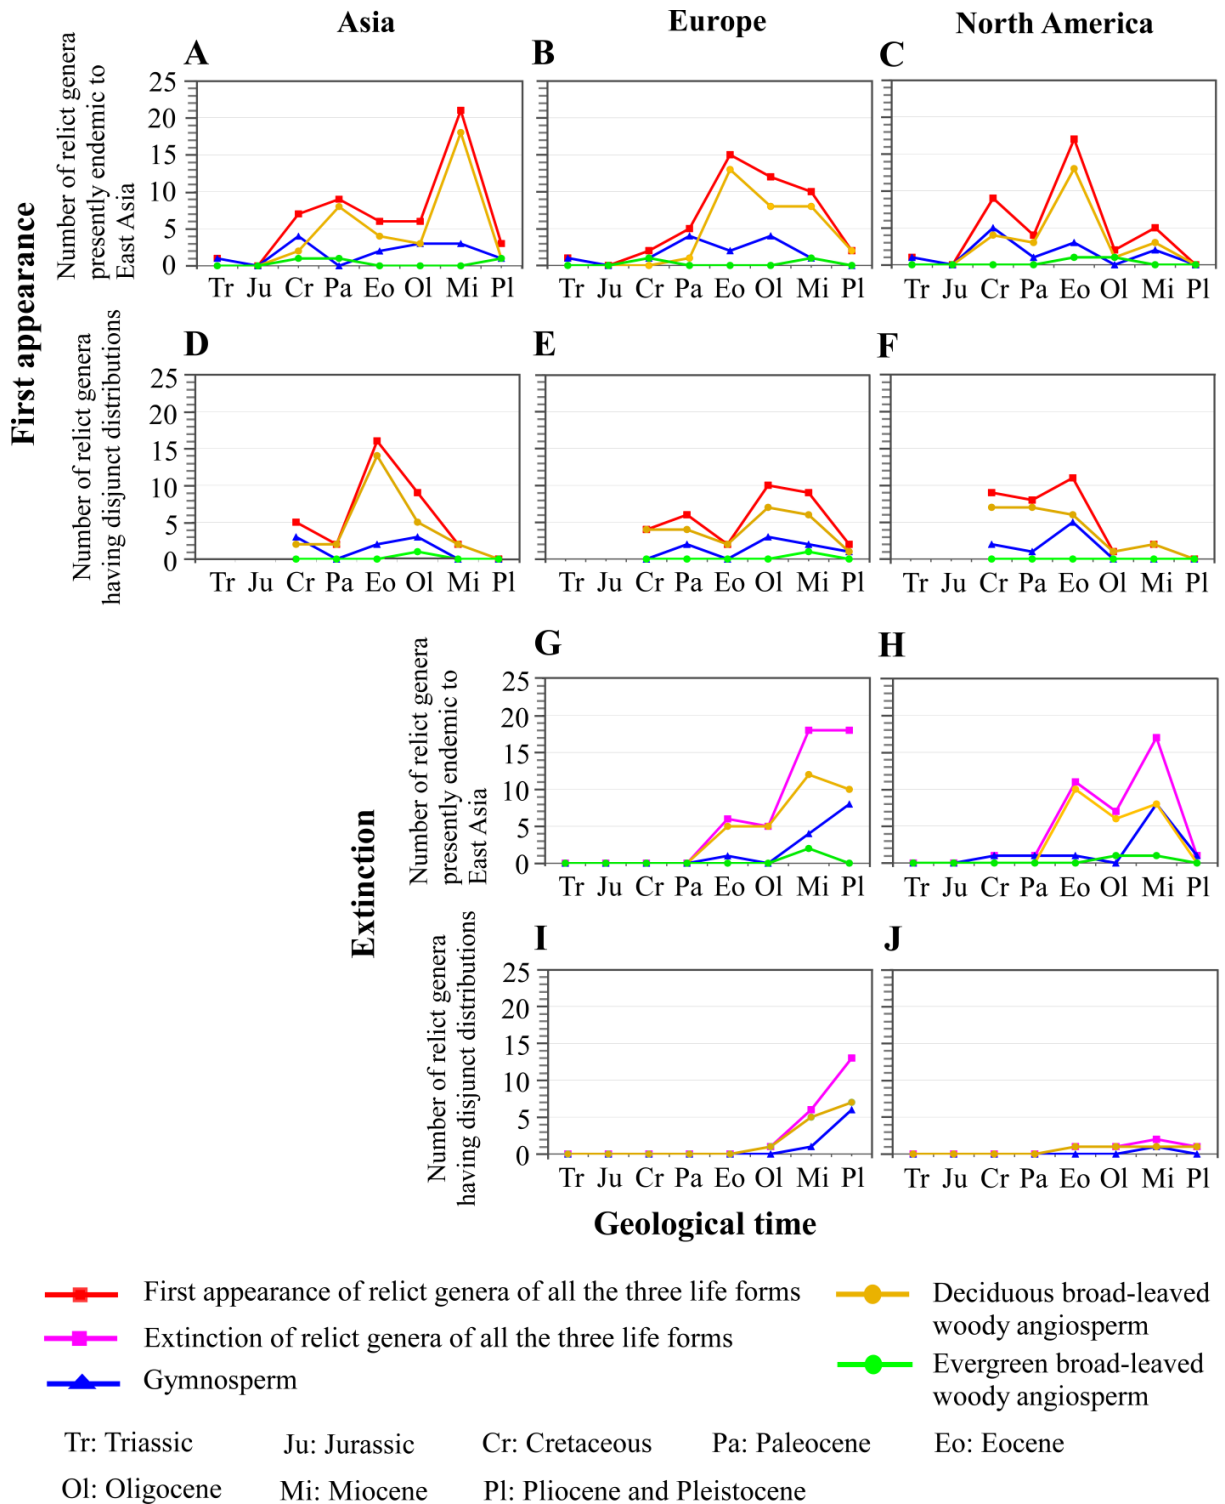

**Supplementary Fig. 6 Changes in number of relict genera through geological time.** (A)–(F) The number of the relict genera first appearing in Asia, Europe and North America. (G)–(J) The number of the relict genera that became extinct in Europe and North America.

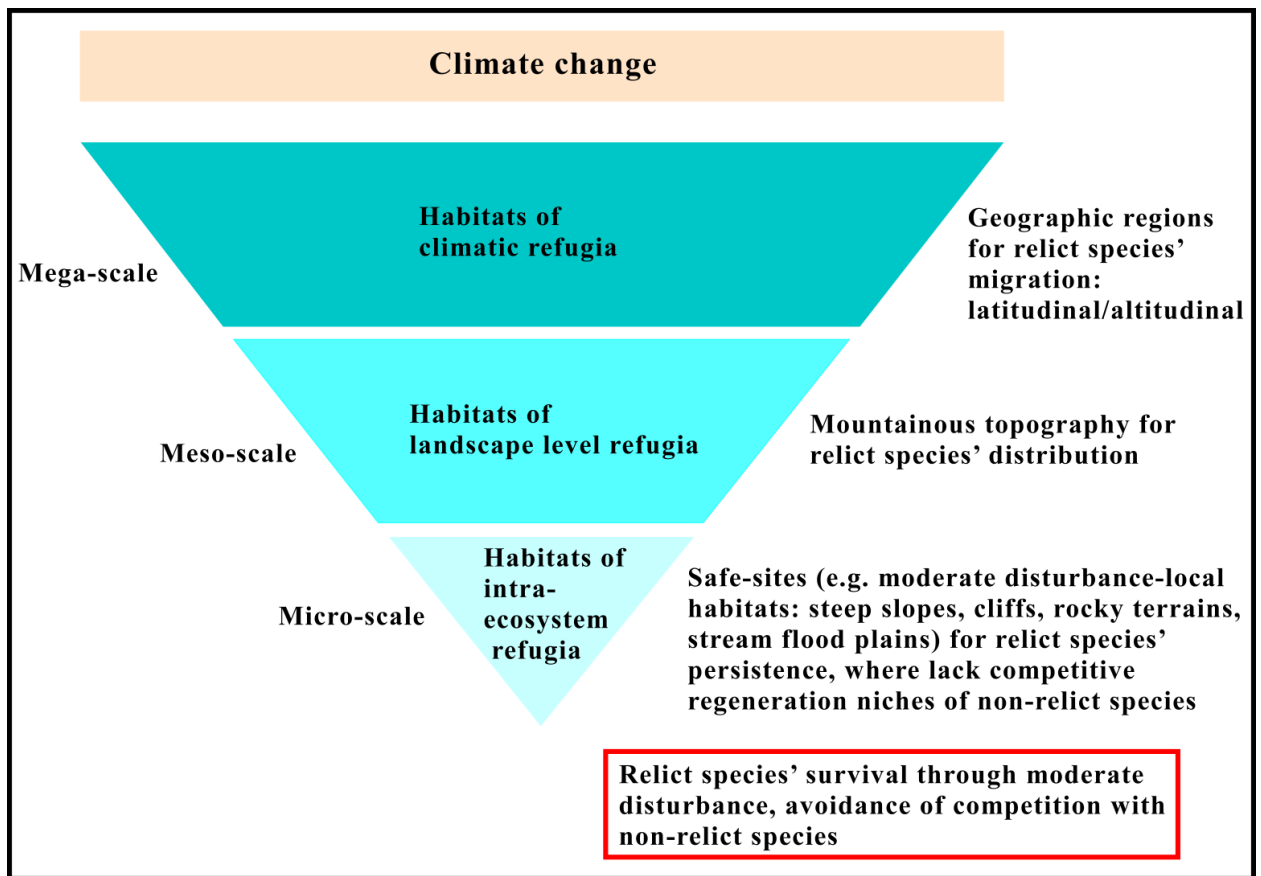

Supplementary Fig. 7 Schematic diagram of hierarchical habitat structure of refugia for relict plant species in East Asia.

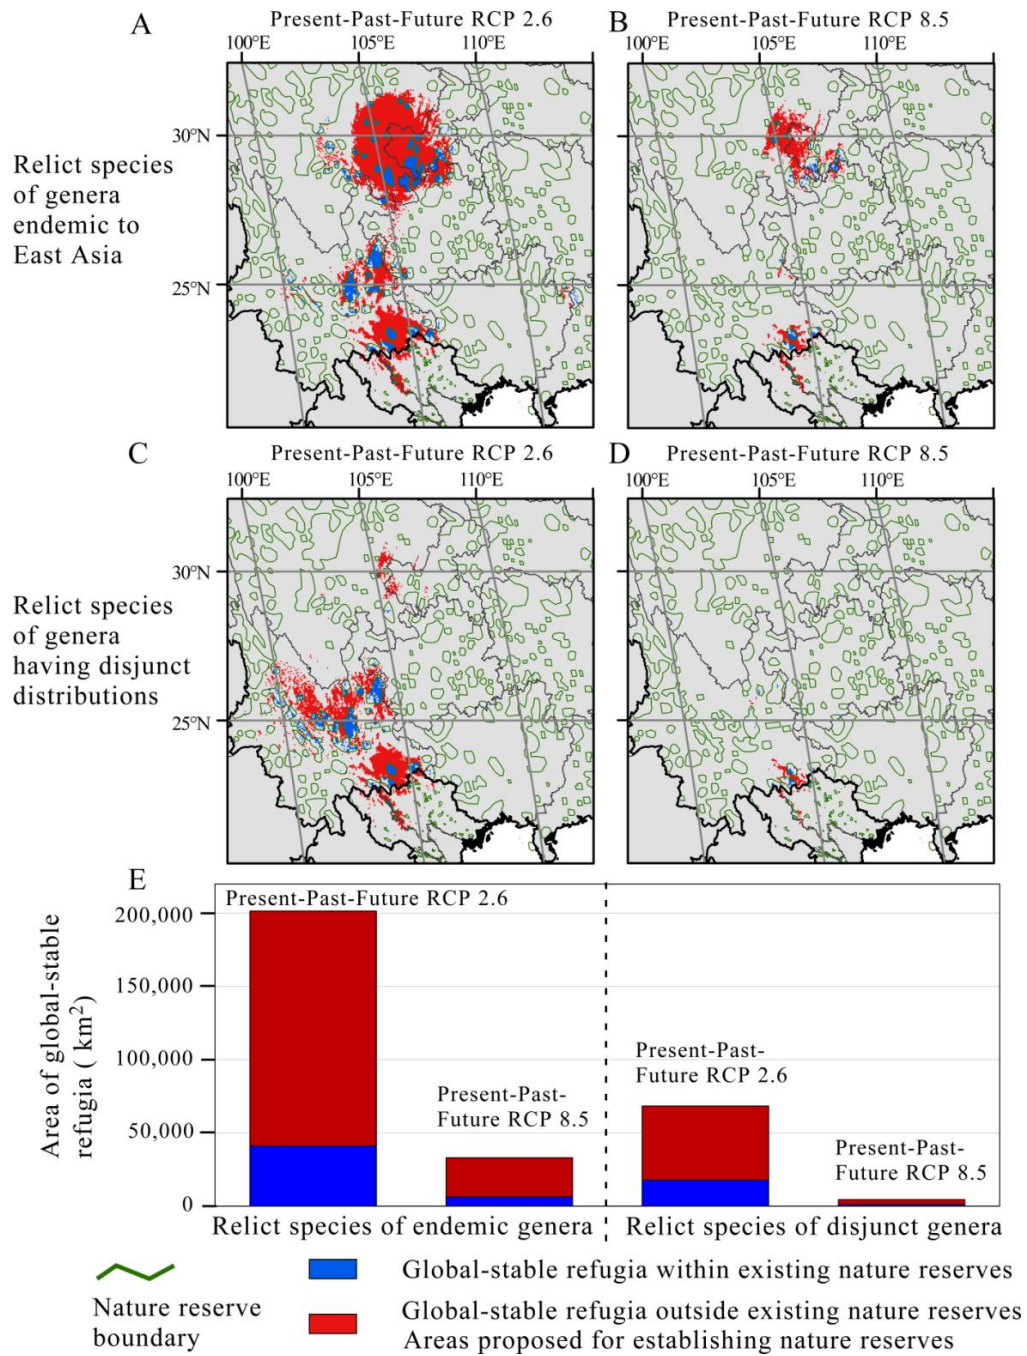

**Supplementary Fig. 8 Modeled long-term stable refugia within and outside existing protected areas (nature reserves) under climatic scenarios, with areas proposed for conservation.** (A)–(B) For relict species of genera endemic to East Asia: (A) under scenarios of present-past-future RCP 2.6, (B) under scenarios of present-past-future RCP 8.5. (C)–(D) For relict species of genera having disjunct distributions: (C) under scenarios of present-past-future RCP 2.6, (D) under scenarios of present-past-future RCP 8.5. (E) Areas of long-term stable refugia under various scenarios. Maps were generated using the software ArcGIS v. 10.5 (ESRI, Redlands, CA, USA) and modified using Canvas 12 (ACD Systems of America, Inc., Seattle, WA, USA). Map layers were obtained from site [www.gadm.org](http://www.gadm.org).

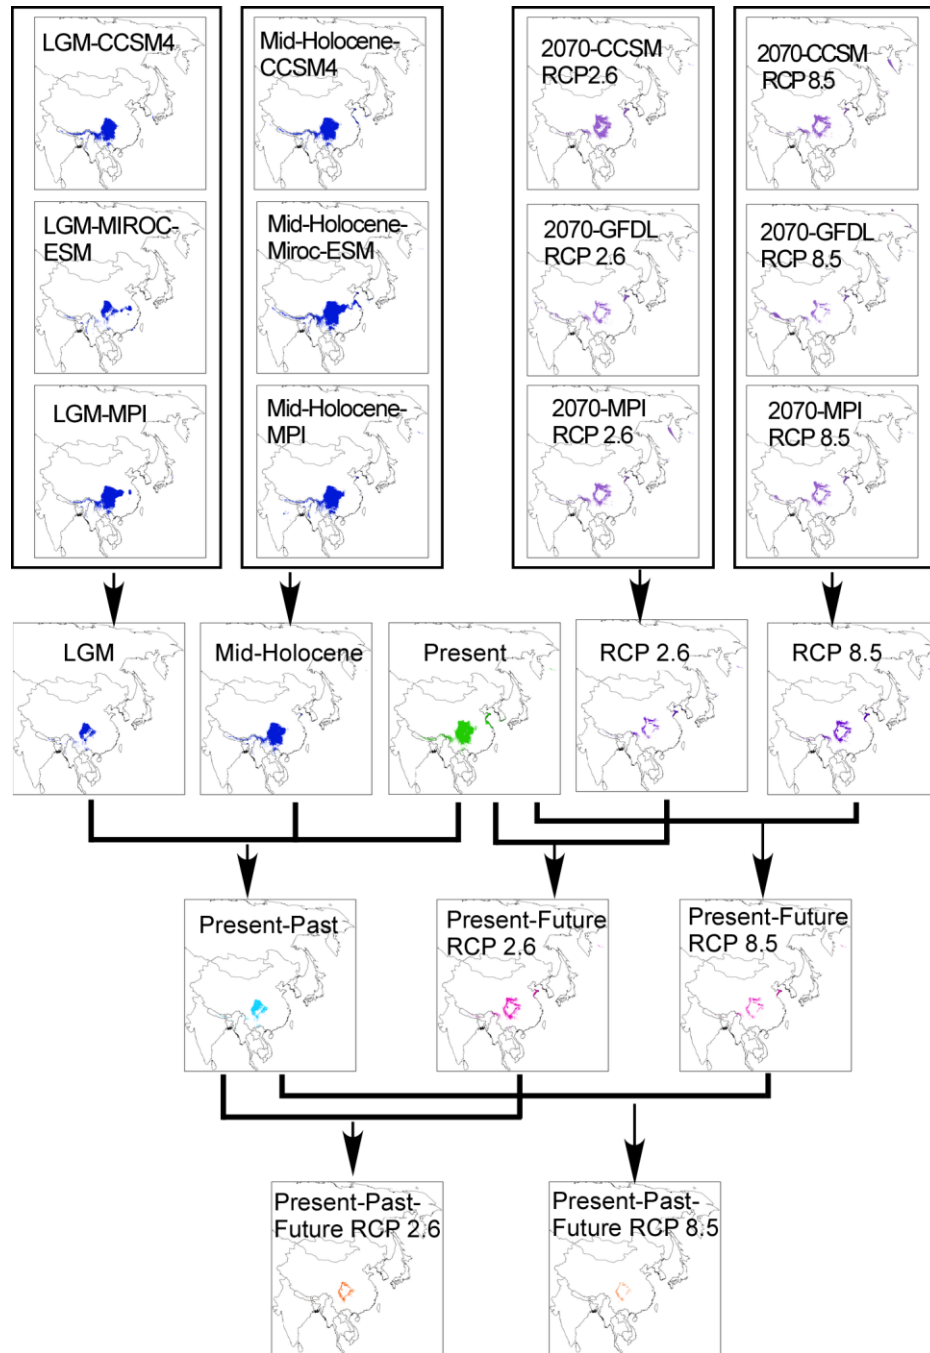

**Supplementary Fig. 9 Assessment of five different types of time combinations (showing relict *Davidia involucrata* as an example).** LGM: the overlap of the three LGM models; Mid-Holocene: the overlap of the three Mid-Holocene models; RCP 2.6: the overlap of the three 2070 RCP 2.6 models; RCP 8.5: the overlap of the three 2070 RCP 8.5 models; Present-Past: the overlap of the present with all the past models; Present-Future RCP 2.6: the overlap of the present with all the future models of RCP 2.6; Present-Future RCP 8.5: the overlap of the present with all the future models of RCP 8.5; Present-Past-Future RCP 2.6: the overlaps of the Present-Past with the Present-Future RCP 2.6; Present-Past-Future RCP 8.5: the overlap of the Present-Past with the Present-Future RCP 8.5. Maps were generated using the software ArcGIS v. 10.5 (ESRI, Redlands, CA, USA) and modified using Canvas 12 (ACD Systems of America, Inc., Seattle, WA, USA). Map layers were obtained from site [www.gadm.org](http://www.gadm.org).

**Supplementary Table 1 Relict genera endemic to East Asia.**

Ev.=evergreen; Dec.=deciduous; Semi-Ev.=semi-evergreen; Sub-Ev.=sub-evergreen

Country code: AU=Australia, BG=Bulgaria, CA=Canada, CN=China, DE=Germany, FR=France, GE=Georgia, HU=Hungary, IE=Ireland, JP=Japan, KZ=Kazakhstan, MX=Mexico, PL=Poland, RU=Russia, UA=Ukraine, UK=United Kingdom, US=United States, UZ=Uzbekistan

~~~ indicates presence in none of the mega/macrofossil records, but having primitive morphologic characteristics or phylogenetic evidence that the genus is of Tertiary origin.

\* Data sources: Please see the Methods section.

| <b>Extant genus</b>    | <b>Life form</b>              | <b>Date of earliest known fossil*</b> | <b>Country where the earliest fossil was found*</b> |
|------------------------|-------------------------------|---------------------------------------|-----------------------------------------------------|
| <b>Gymnosperm</b>      |                               |                                       |                                                     |
| <i>Amentotaxus</i>     | Shrubs or small trees, Ev.    | Cretaceous                            | CA                                                  |
| <i>Cathaya</i>         | Trees, Ev.                    | Oligocene                             | DE                                                  |
| <i>Cephalotaxus</i>    | Trees or shrubs, Ev.          | Eocene                                | CN, DE                                              |
| <i>Cryptomeria</i>     | Trees, Ev.                    | Paleocene                             | IE                                                  |
| <i>Cunninghamia</i>    | Trees, Ev.                    | Cretaceous                            | CN, JP, US, CA                                      |
| <i>Fokienia</i>        | Trees, Ev.                    | Miocene                               | CN                                                  |
| <i>Ginkgo</i>          | Trees, Dec.                   | Triassic                              | CN, RU, AU, GE, UZ, UA, CA                          |
| <i>Glyptostrobus</i>   | Trees, Dec.                   | Cretaceous                            | CN, JP, US, CA                                      |
| <i>Keteleeria</i>      | Trees, Ev.                    | Eocene                                | CA                                                  |
| <i>Metasequoia</i>     | Trees, Dec.                   | Cretaceous                            | CN, JP, US, CA                                      |
| <i>Nothotsuga</i>      | Trees, Ev.                    | Miocene                               | DE                                                  |
| <i>Pseudolarix</i>     | Trees, Dec.                   | Eocene                                | CN, JP, DE, CA, US                                  |
| <i>Pseudotaxus</i>     | Shrubs, Ev.                   | ~~~                                   | ~~~                                                 |
| <i>Sciadopitys</i>     | Trees, Ev.                    | Paleocene                             | CA                                                  |
| <i>Taiwania</i>        | Trees, Ev.                    | Cretaceous                            | US, CA, RU                                          |
| <i>Thujopsis</i>       | Trees, Ev.                    | Miocene                               | JP                                                  |
| <b>Angiosperm</b>      |                               |                                       |                                                     |
| <i>Akebia</i>          | Woody lianas, Dec. or Sub-Ev. | Miocene                               | JP, DE                                              |
| <i>Alcimandra</i>      | Trees, Ev.                    | ~~~                                   | ~~~                                                 |
| <i>Amesiodendron</i>   | Trees, Ev.                    | ~~~                                   | ~~~                                                 |
| <i>Ammopiptanthus</i>  | Shrubs, Ev.                   | ~~~                                   | ~~~                                                 |
| <i>Aptosperma</i>      | Shrubs or small trees, Ev.    | ~~~                                   | ~~~                                                 |
| <i>Archiboehmeria</i>  | Shrubs or subshrubs, Dec.     | ~~~                                   | ~~~                                                 |
| <i>Bretschneidera</i>  | Trees, Dec.                   | ~~~                                   | ~~~                                                 |
| <i>Burretiodendron</i> | Trees, Dec. or Semi-Ev.       | Miocene                               | CN                                                  |
| <i>Camptotheca</i>     | Trees, Dec.                   | Oligocene                             | JP                                                  |
| <i>Cercidiphyllum</i>  | Trees, Dec.                   | Cretaceous                            | US                                                  |
| <i>Choerospondias</i>  | Trees, Dec.                   | Eocene                                | UK                                                  |
| <i>Corylopsis</i>      | Shrubs or small trees, Dec.   | Cretaceous                            | CN                                                  |
| <i>Craigia</i>         | Trees, Dec.                   | Paleocene                             | RU                                                  |
| <i>Cyclocarya</i>      | Trees, Dec.                   | Paleocene                             | US                                                  |
| <i>Davidia</i>         | Trees, Dec.                   | Cretaceous                            | CA                                                  |

|                        |                             |            |                    |
|------------------------|-----------------------------|------------|--------------------|
| <i>Decaisnea</i>       | Shrubs, Dec.                | Eocene     | DE                 |
| <i>Dipelta</i>         | Shrubs, Dec.                | Eocene     | US, UK             |
| <i>Dipentodon</i>      | Shrubs or trees, Semi-Ev.   | ~~~        | ~~~                |
| <i>Diplopanax</i>      | Trees, Ev.                  | Eocene     | US, CA             |
| <i>Dipteronia</i>      | Trees, Dec.                 | Paleocene  | US, RU             |
| <i>Disanthus</i>       | Shrubs, Dec.                | Paleocene  | JP, DE             |
| <i>Emmenopterys</i>    | Trees, Dec.                 | Eocene     | US, DE             |
| <i>Engelhardia</i>     | Trees, Dec.                 | Eocene     | US                 |
| <i>Eucommia</i>        | Trees, Dec.                 | Eocene     | CN, JP, KZ, US, CA |
| <i>Euptelea</i>        | Trees or shrubs, Dec.       | Eocene     | US                 |
| <i>Euryale</i>         | Perennial herbs, aquatic    | Miocene    | RU                 |
| <i>Eurycorymbus</i>    | Trees, Dec.                 | ~~~        | ~~~                |
| <i>Euryodendron</i>    | Trees, Ev.                  | ~~~        | ~~~                |
| <i>Euscaphis</i>       | Small trees or shrubs, Dec. | Oligocene  | DE                 |
| <i>Exbucklandia</i>    | Trees, Ev.                  | Paleocene  | CN                 |
| <i>Fortunearia</i>     | Shrubs or small trees, Dec. | Oligocene  | DE                 |
| <i>Hemiptelea</i>      | Shrubs or trees, Dec.       | Eocene     | CN                 |
| <i>Heptacodium</i>     | Shrubs or small trees, Dec. | ~~~        | ~~~                |
| <i>Hovenia</i>         | Trees or shrubs, Dec.       | Eocene     | CA, US             |
| <i>Idesia</i>          | Trees, Dec.                 | Eocene     | JP, KZ,            |
| <i>Kalopanax</i>       | Trees, Dec.                 | Eocene     | RU                 |
| <i>Kmeria</i>          | Trees, Ev.                  | ~~~        | ~~~                |
| <i>Koelreuteria</i>    | Trees, Dec.                 | Cretaceous | CA                 |
| <i>Kolkwitzia</i>      | Shrubs, Dec.                | ~~~        | ~~~                |
| <i>Loropetalum</i>     | Trees or shrubs, Dec.       | Miocene    | JP                 |
| <i>Loxococcus</i>      | Palm trees, Ev.             | ~~~        | ~~~                |
| <i>Manglietiastrum</i> | Trees, Ev.                  | ~~~        | ~~~                |
| <i>Meliiodendron</i>   | Trees or shrubs, Dec.       | Miocene    | JP                 |
| <i>Monimopetalum</i>   | Scandent shrubs, Semi-Ev.   | ~~~        | ~~~                |
| <i>Ostryopsis</i>      | Shrubs, Dec.                | ~~~        | ~~~                |
| <i>Parakmeria</i>      | Trees, Ev.                  | ~~~        | ~~~                |
| <i>Parapyrenaria</i>   | Trees, Ev.                  | ~~~        | ~~~                |
| <i>Paulownia</i>       | Trees, Dec. or Ev.          | Miocene    | JP, DE             |
| <i>Phellodendron</i>   | Trees, Dec.                 | Oligocene  | DE                 |
| <i>Piptanthus</i>      | Shrubs, Ev.                 | ~~~        | ~~~                |
| <i>Platycarya</i>      | Trees or shrubs, Dec.       | Cretaceous | CN, MX, US         |
| <i>Platyclusus</i>     | Trees or shrubs, Dec.       | Miocene    | CN                 |
| <i>Poliathyrsis</i>    | Trees, Dec.                 | ~~~        | ~~~                |
| <i>Potaninia</i>       | Shrublets, Dec.             | ~~~        | ~~~                |
| <i>Pteroceltis</i>     | Trees, Dec.                 | Eocene     | US                 |
| <i>Pterostyrax</i>     | Trees or shrubs, Dec.       | Oligocene  | DE                 |
| <i>Rehderodendron</i>  | Trees, Dec.                 | Eocene     | UK                 |
| <i>Rhodoleia</i>       | Trees or shrubs, Ev.        | Cretaceous | DE                 |

|                        |                                 |            |                |
|------------------------|---------------------------------|------------|----------------|
| <i>Rhoiptelea</i>      | Trees, Dec.                     | ~~~        | ~~~            |
| <i>Sargentodoxa</i>    | Shrubs, climbing, Dec.          | Eocene     | US, DE         |
| <i>Schizophragma</i>   | Shrubs or scandent shrubs, Dec. | Miocene    | JP             |
| <i>Semiliquidambar</i> | Trees, Dec. or Ev.              | ~~~        | ~~~            |
| <i>Sinofranchetia</i>  | Woody lianas, Dec.              | ~~~        | ~~~            |
| <i>Sinojackia</i>      | Trees or shrubs, Dec.           | ~~~        | ~~~            |
| <i>Sinomenium</i>      | Woody vines, Ev.                | Miocene    | JP, US, FR, GE |
| <i>Sinopanax</i>       | Shrubs or small trees, Ev.      | ~~~        | ~~~            |
| <i>Sinowilsonia</i>    | Shrubs or small trees, Ev.      | ~~~        | ~~~            |
| <i>Skimmia</i>         | Shrubs or trees, Ev.            | Miocene    | BG             |
| <i>Tapiscia</i>        | Trees, Dec.                     | Eocene     | US, DE         |
| <i>Tetracentron</i>    | Trees, Dec.                     | Paleocene  | CN, JP, RU     |
| <i>Tetraena</i>        | Shrubs, Dec.                    | ~~~        | ~~~            |
| <i>Tetrapanax</i>      | Shrubs or small trees, Ev.      | ~~~        | ~~~            |
| <i>Toricellia</i>      | Trees or shrubs, Dec.           | Paleocene  | US             |
| <i>Trapella</i>        | Herbs, aquatic                  | Miocene    | JP, HU         |
| <i>Tripterygium</i>    | Scandent shrubs, Dec.           | Pliocene   | JP             |
| <i>Trochodendron</i>   | Trees or shrubs, Ev.            | Cretaceous | JP             |
| <i>Weigela</i>         | Shrubs, Dec.                    | Oligocene  | RU             |

**Supplementary Table 2 Relict genera with disjunct distributions between East Asia and other parts of the world.**

Ev.=evergreen; Dec.=deciduous; Semi-Ev.=semi-evergreen; Sub-Ev=sub-evergreen

Country code:

AR=Argentina, BE=Belgium, CA=Canada, CN=China, DE=Germany, JP=Japan, KZ=Kazakhstan, RU=Russia, UK=United Kingdom, US=United States

~~~ indicates presence in none of the mega/macrofossil records, but having primitive morphologic characteristics or phylogenetic evidence that the genus is of Tertiary origin.

\* Data sources: Please see the Methods section.

| <b>Extant genus</b>  | <b>Life form</b>     | <b>Date of earliest known fossil*</b> | <b>Country where the earliest fossil was found*</b> |
|----------------------|----------------------|---------------------------------------|-----------------------------------------------------|
| <b>Gymnosperm</b>    |                      |                                       |                                                     |
| <i>Calocedrus</i>    | Trees, Ev.           | Eocene                                | CA                                                  |
| <i>Cedrus</i>        | Trees, Ev.           | Cretaceous                            | US, RU                                              |
| <i>Chamaecyparis</i> | Trees, Ev.           | Paleocene                             | RU, KZ                                              |
| <i>Pseudotsuga</i>   | Trees, Ev.           | Eocene                                | US                                                  |
| <i>Taxus</i>         | Trees or shrubs, Ev. | Cretaceous                            | CN                                                  |
| <i>Thuja</i>         | Trees or shrubs, Ev. | Cretaceous                            | JP                                                  |
| <i>Torreya</i>       | Trees or shrubs, Ev. | Cretaceous                            | US                                                  |
| <i>Tsuga</i>         | Trees, Ev.           | Eocene                                | US, CA                                              |
| <i>Xanthocyparis</i> | Trees, Ev.           | ~~~                                   | ~~~                                                 |

| <b>Angiosperm</b>     |                                        |            |                |
|-----------------------|----------------------------------------|------------|----------------|
| <i>Aesculus</i>       | Trees or shrubs, Dec.                  | Paleocene  | US, CA         |
| <i>Calycanthus</i>    | Shrubs, Dec.                           | Miocene    | DE             |
| <i>Carya</i>          | Trees, Dec.                            | Cretaceous | US             |
| <i>Castanea</i>       | Trees or shrubs, Dec.                  | Paleocene  | US, CA         |
| <i>Catalpa</i>        | Trees, Dec.                            | Eocene     | CN, US         |
| <i>Corylus</i>        | Shrubs or trees, Dec.                  | Paleocene  | CN, US         |
| <i>Fagus</i>          | Trees, Dec.                            | Cretaceous | DE, US         |
| <i>Gleditsia</i>      | Trees or shrubs, Dec.                  | Eocene     | JP, US         |
| <i>Gymnocladus</i>    | Trees, Dec.                            | Miocene    | CN, RU         |
| <i>Halesia</i>        | Trees or shrubs, Dec.                  | Eocene     | US             |
| <i>Hamamelis</i>      | Shrubs or small trees, Dec.            | Eocene     | JP, US         |
| <i>Juglans</i>        | Trees or shrubs, Dec.                  | Cretaceous | US, CA         |
| <i>Liquidambar</i>    | Trees, Dec.                            | Cretaceous | US, AR         |
| <i>Liriodendron</i>   | Trees, Dec.                            | Cretaceous | JP, DE, US, CA |
| <i>Nanophyton</i>     | Cushion subshrubs, Dec.                | ~~~        | ~~~            |
| <i>Nyssa</i>          | Trees, Dec.                            | Cretaceous | US             |
| <i>Ostrya</i>         | Trees, Dec.                            | Cretaceous | DE             |
| <i>Pachysandra</i>    | Subshrubs or perennial herbs, Ev.      | ~~~        | ~~~            |
| <i>Paliurus</i>       | Trees or shrubs, Ev. or Dec.           | Paleocene  | CA             |
| <i>Parrotia</i>       | Trees, Dec.                            | Eocene     | JP             |
| <i>Parthenocissus</i> | Woody lianas, Dec. or Semi-Ev.         | Paleocene  | BE, US         |
| <i>Periploca</i>      | Shrubs scandent, Dec. or Ev.           | Eocene     | BE             |
| <i>Platanus</i>       | Trees, Dec. or Semi-Ev.                | Cretaceous | RU, US, CA     |
| <i>Pterocarya</i>     | Trees, Dec.                            | Cretaceous | DE             |
| <i>Reevesia</i>       | Trees, Dec. or Ev.                     | Oligocene  | JP             |
| <i>Sambucus</i>       | Shrubs or perennial herbs, Ev. or Dec. | Paleocene  | UK             |
| <i>Sassafras</i>      | Trees, Dec.                            | Cretaceous | US, CA, AR     |
| <i>Staphylea</i>      | Small trees or shrubs, Dec.            | Miocene    | JP, US         |
| <i>Trigonobalanus</i> | Trees, Ev.                             | ~~~        | ~~~            |
| <i>Wisteria</i>       | Woody lianas, Dec.                     | Oligocene  | RU             |
| <i>Zelkova</i>        | Trees, Dec.                            | Eocene     | CN, JP, US, CA |



**Supplementary Table 3 Core areas of relict species richness of genera endemic to East Asia.** The latitudinal and longitudinal ranges of core areas correspond to the polygons in Supplementary Fig. 4A.

| Rank | Geographic region where core area is situated | Species richness | Latitudes | Longitudes | Elevational range | Major mountain ranges                                                                                                                                                                                                                  |
|------|-----------------------------------------------|------------------|-----------|------------|-------------------|----------------------------------------------------------------------------------------------------------------------------------------------------------------------------------------------------------------------------------------|
| 1    | Southwestern China                            | 144              | 23–35     | 101–110    | 480–2700          | Liupan Mts, Qinling Mts, Daba Mts, Longmen Mts, Qionglai Mts, Daliang Mts, Wumeng Mts, Wulianfeng Mts, Wu Mts, Huaying Mts, Dalou Mts, Wulin Mts, Miaoling Mts, Jiuwandashan Mts, Fenghuang Mts, Duyang Mts, Liuzhao Mts, Jinzhong Mts |
| 2    | South-central China                           | 108              | 26–34     | 110–113    | 380–2200          | Xionger Mts of Qinling Mts, Funiu Mts of Qinling Mts, Daba Mts, Wu Mts, Wulin Mts, Xuefeng Mts                                                                                                                                         |
| 3    | Southern China                                | 102              | 22–26     | 110–116    | 550–1990          | Nanling Mts, Dayao Mts, Yunkai Mts, Yunwu Mts, Jiulian Mts, Wuyi Mts, Luofu Mts                                                                                                                                                        |
| 4    | Northern Vietnam-Southwestern China           | 100              | 22–24     | 103–108    | 320–2650          | Liuzhao Mts, Gongmu Mts, Daqing Mts, Hoang Lien Son Mts, Cao Bang Mountains/Hills                                                                                                                                                      |
| 5    | Southeastern China                            | 88               | 25–33     | 116–122    | 270–1900          | Tianmu Mts, Huaiyu Mts, Xianxialing Mts, Wuyi Mts, Yu Mts, Daimao Mts                                                                                                                                                                  |
| 6    | South-central China                           | 80               | 26–32     | 114–117    | 460–1700          | Dabie Mts, Mufu Mts, Wugong Mts, Zhuguang Mts                                                                                                                                                                                          |
| 7    | Boundary of NW Yunnan, Tibet and Myanmar      | 62               | 25–29     | 98–100     | 1250–3100         | Gaoligong Mts, Nu Mts, Yunling Mts                                                                                                                                                                                                     |
| 8    | Southwestern China                            | 44               | 24–26     | 100–101    | 1200–2800         | Wuliang Mts, Ailao Mts                                                                                                                                                                                                                 |
| 9    | South-central to Central Japan                | 39               | 33–37     | 133–140    | 85–2220           | Shikoku Mts, Chugoku Mts, Kii Mts, Hida Mts, Kiso Mts, Akaishi Mts, Echigo Mts,                                                                                                                                                        |
| 10   | Southern Japan                                | 30               | 32–34     | 130–131    | 30–1510           | Kyushu Mts                                                                                                                                                                                                                             |

**Supplementary Table 4 Core areas of rarity-weighted richness (RWR) of relict species of genera endemic to East Asia.**

The latitudinal and longitudinal ranges of core areas correspond to the polygons in Supplementary Fig. 4B.

| Rank | Geographic region where core area is situated | RWR  | Latitudes | Longitudes | Elevational range | Major mountain ranges                                                                                                      |
|------|-----------------------------------------------|------|-----------|------------|-------------------|----------------------------------------------------------------------------------------------------------------------------|
| 1    | Northern Vietnam-Southwestern China           | 7.89 | 19–24     | 103–108    | 450–2600          | Liuzhao Mts, Gongmu Mts, Daqing Mts, Hoang Lien Son Mts, Tay Con Linh Mts, Con Voi Mts, Cao Bang Mountains/Hills           |
| 2    | Southwestern China                            | 6.45 | 24–32     | 105–110    | 450–2500          | Daba Mts, Wu Mts, Dalou Mts, Wulin Mts, Miaoling Mts, Jiuwandashan Mts, Fenghuang Mts, Duyang Mts, Dayao Mts, Jinzhong Mts |
| 3    | Boundary of NW Yunnan and Myanmar             | 5.32 | 25–29     | 97–100     | 1200–3100         | Yunling Mts, Nu Mts, Gaoligong Mts                                                                                         |
| 4    | Southwestern China                            | 4.66 | 25–33     | 101–105    | 675–2800          | Daba Mts, Longmen Mts, Qionglai Mts, Daliang Mts, Wulianfeng Mts, Wumeng Mts, Lunan Mts                                    |
| 5    | Southern China                                | 4.45 | 23–27     | 110–115    | 350–1700          | Nanling Mts, Dayao Mts, Jiulian Mts                                                                                        |
| 6    | South-central China                           | 3.58 | 26–28     | 110–113    | 510–1640          | Xuefeng Mts                                                                                                                |
| 7    | Southeastern China                            | 3.10 | 27–30     | 115–118    | 350–1900          | Mufu Mts, Huaiyu Mts, Wuyi Mts                                                                                             |
| 8    | Taiwan                                        | 2.34 | 22–26     | 120–122    | 200–2500          | Taiwan Mts, Central Mountain Range                                                                                         |
| 9    | South-central China                           | 2.30 | 29–32     | 110–111    | 400–2000          | Daba Mts, Wu Mts                                                                                                           |
| 10   | Southeastern China                            | 1.94 | 28–31     | 119–122    | 180–1300          | Tianmu Mts, Xianxialing Mts                                                                                                |
| 11   | Southern China (Hainan)                       | 1.85 | 18–20     | 108–111    | 300–1580          | Wuzhi Mts                                                                                                                  |
| 12   | Central Japan                                 | 1.75 | 34–37     | 135–140    | 65–2220           | Kii Mts, Hida Mts, Kiso Mts, Akaishi Mts, Echigo Mts                                                                       |
| 13   | South-central Japan                           | 1.02 | 33–35     | 132–134    | 50–1840           | Chugoku Mts, Shikoku Mts                                                                                                   |

**Supplementary Table 5 Core areas of relict species richness of genera having disjunct distributions between East Asia and other parts of the world.** The latitudinal and longitudinal ranges of core areas correspond to the polygons in Supplementary Fig. 4C.

| Rank | Geographic region where core area is situated | Species richness | Latitudes | Longitudes | Elevational range | Major mountain ranges                                                                                          |
|------|-----------------------------------------------|------------------|-----------|------------|-------------------|----------------------------------------------------------------------------------------------------------------|
| 1    | Southwestern China                            | 93               | 24–35     | 104–110    | 600–2800          | Qinling Mts, Daba Mts, Huaying Mts, Wu Mts, Dalou Mts, Wulin Mts, Miaoling Mts, Jiuwandashan Mts, Jinzhong Mts |
| 2    | Southern China                                | 71               | 24–28     | 110–115    | 500–1990          | Xuefeng Mts, Nanling Mts, Zhuguang Mts, Jiulian Mts                                                            |
| 3    | South-central China                           | 68               | 28–34     | 110–113    | 600–2050          | Daba Mts, Wulin Mts, Wu Mts, Funiu Mts of Qinling Mts                                                          |
| 4    | Northern Vietnam-Southwestern China           | 66               | 22–24     | 103–107    | 700–2200          | Liuzhao Mts, Ailao Mts, Gongmu Mts, Daqing Mts, Hoang Lien Son Mts, Cao Bang Mts/Hills                         |
| 5    | Southwestern China                            | 65               | 28–34     | 102–105    | 710–2900          | Qinling Mts, Daba Mts, Longmen Mts, Qionglai Mts, Daliang Mts                                                  |
| 6    | Southwestern China                            | 63               | 24–28     | 99–103     | 1300–3000         | Yunling Mts                                                                                                    |
| 7    | Southeastern China                            | 61               | 27–33     | 116–122    | 270–1800          | Tianmu Mts, Huaiyu Mts, Yu Mts, Wuyi Mts, Xianxialing Mts                                                      |
| 8    | South-central China                           | 59               | 26–32     | 114–117    | 480–1850          | Dabie Mts, Mufu Mts, Wugong Mts, Zhuguang Mts                                                                  |
| 9    | Boundary of NW Yunnan, Tibet and Myanmar      | 36               | 26–29     | 98–99      | 1200–3100         | Gaoligong Mts, Nu Mts, Yunling Mts                                                                             |
| 10   | South-Central Japan                           | 29               | 34–35     | 135–137    | 60–1850           | Kii Mts                                                                                                        |
| 11   | Central Japan                                 | 28               | 35–38     | 137–140    | 85–2500           | Kiso Mts, Akaishi Mts, Echigo Mts                                                                              |

**Supplementary Table 6 Core areas of rarity-weighted richness (RWR) of relict species of genera having disjunct distributions between East Asia and other parts of the world.** The latitudinal and longitudinal ranges of core areas correspond to the polygons in Supplementary Fig. 4D.

| Rank | Geographic region where core area is situated | RWR   | Latitudes | Longitudes | Elevational range | Major mountain ranges                                                                        |
|------|-----------------------------------------------|-------|-----------|------------|-------------------|----------------------------------------------------------------------------------------------|
| 1    | Northern Vietnam-Southwestern China           | 11.50 | 21–24     | 102–108    | 700–2800          | Ailao Mts, Liuzhao Mts, Gongmu Mts, Daqing Mts, Hoang Lien Son Mts, Cao Bang Mountains/Hills |
| 2    | South-central China                           | 4.61  | 29–32     | 108–111    | 800–2100          | Daba Mts, Wu Mts                                                                             |
| 3    | Southwestern China                            | 3.85  | 25–28     | 99–103     | 1000–3000         | Daxue Mts, Gongwan Mts, Lunan Mts                                                            |
| 4    | Boundary of NE India and Bangladesh           | 3.69  | 24–26     | 90–92      | 88–1380           | Garo Khasi Jaintia Hills                                                                     |
| 5    | Boundary of NW Yunnan and Myanmar             | 2.44  | 25–28     | 98–99      | 1300–3000         | Gaoligong Mts, Nu Mts                                                                        |
| 6    | Southwestern China                            | 2.28  | 24–26     | 107–109    | 600–1860          | Miaoling Mts, Jiuwandashan Mts                                                               |
| 7    | Taiwan                                        | 2.24  | 22–26     | 120–122    | 600–2900          | Taiwan Mts, Central Mountain Range                                                           |
| 8    | Northern Vietnam-Central Laos                 | 2.20  | 18–21     | 104–106    | 200–2000          | Annamite Mts                                                                                 |
| 9    | Southwestern China                            | 2.00  | 24–25     | 104–106    | 700–2340          | Jinzhong Mts                                                                                 |
| 10   | Southern China                                | 1.82  | 24–26     | 112–115    | 650–1790          | Nanling Mts                                                                                  |
| 11   | Southeastern China                            | 1.41  | 30–31     | 118–121    | 325–1200          | Tianmu Mts                                                                                   |
| 12   | Southern China (Hainan)                       | 0.93  | 18–19     | 109–111    | 300–1580          | Wuzhi Mts                                                                                    |
| 13   | South-central Japan                           | 0.86  | 34–35     | 135–137    | 60–1850           | Kii Mts                                                                                      |

**Supplementary Table 7 Predicted areas as suitable for relict species richness categories of genera endemic to East Asia.**

| <b>Model</b>            | <b>Total predicted area (km<sup>2</sup>) for 1-128 relict species</b> | <b>Predicted area (km<sup>2</sup>) for 1-5 relict species</b> | <b>Predicted area (km<sup>2</sup>) for 6-10 relict species</b> | <b>Predicted area (km<sup>2</sup>) for 11-20 relict species</b> | <b>Predicted area (km<sup>2</sup>) for 21-50 relict species</b> | <b>Predicted area (km<sup>2</sup>) for 51-128 relict species</b> |
|-------------------------|-----------------------------------------------------------------------|---------------------------------------------------------------|----------------------------------------------------------------|-----------------------------------------------------------------|-----------------------------------------------------------------|------------------------------------------------------------------|
| Present                 | 42,228,432                                                            | 30,883,451                                                    | 4,023,176                                                      | 3,189,459                                                       | 2,477,900                                                       | 1,654,446                                                        |
| Mid-Holocene-CCSM       | 40,129,340                                                            | 28,842,461                                                    | 4,064,817                                                      | 2,979,558                                                       | 2,874,397                                                       | 1,368,107                                                        |
| Mid-Holocene-MIROC      | 40,051,398                                                            | 27,121,248                                                    | 4,683,275                                                      | 3,576,731                                                       | 3,217,226                                                       | 1,452,918                                                        |
| Mid-Holocene-MPI        | 40,569,191                                                            | 28,711,971                                                    | 4,374,264                                                      | 3,113,698                                                       | 2,800,756                                                       | 1,568,502                                                        |
| <i>Average Holocene</i> | <i>40,249,976</i>                                                     | <i>28,225,227</i>                                             | <i>4,374,119</i>                                               | <i>3,223,329</i>                                                | <i>2,964,126</i>                                                | <i>1,463,176</i>                                                 |
| LGM-CCSM                | 32,616,064                                                            | 19,564,336                                                    | 4,819,769                                                      | 4,774,507                                                       | 2,562,049                                                       | 895,403                                                          |
| LGM-MIROC               | 36,926,218                                                            | 24,685,140                                                    | 3,524,284                                                      | 4,709,516                                                       | 3,516,317                                                       | 490,961                                                          |
| LGM-MPI                 | 42,418,133                                                            | 28,310,729                                                    | 5,373,201                                                      | 4,398,969                                                       | 2,898,483                                                       | 1,436,751                                                        |
| <i>Average LGM</i>      | <i>37,320,138</i>                                                     | <i>24,186,735</i>                                             | <i>4,572,418</i>                                               | <i>4,627,664</i>                                                | <i>2,992,283</i>                                                | <i>941,038</i>                                                   |
| 2070-CCSM-RCP 2.6       | 42,804,262                                                            | 30,185,811                                                    | 5,008,867                                                      | 3,518,588                                                       | 2,429,565                                                       | 1,661,431                                                        |
| 2070-CCSM-RCP 8.5       | 44,129,453                                                            | 28,937,049                                                    | 6,131,838                                                      | 4,956,738                                                       | 2,675,336                                                       | 1,428,492                                                        |
| 2070-GFDL-RCP 2.6       | 41,213,439                                                            | 26,523,368                                                    | 6,332,447                                                      | 4,249,670                                                       | 2,999,117                                                       | 1,108,837                                                        |
| 2070-GFDL-RCP 8.5       | 45,929,391                                                            | 25,111,921                                                    | 10,111,091                                                     | 6,852,553                                                       | 3,428,110                                                       | 425,716                                                          |
| 2070-MPI-RCP 2.6        | 43,262,316                                                            | 30,797,093                                                    | 5,000,224                                                      | 3,495,655                                                       | 2,561,216                                                       | 1,408,128                                                        |
| 2070-MPI-RCP 8.5        | 44,028,723                                                            | 28,865,871                                                    | 6,167,938                                                      | 4,838,569                                                       | 3,021,191                                                       | 1,135,154                                                        |
| <i>Average 2070</i>     | <i>43,561,264</i>                                                     | <i>28,403,519</i>                                             | <i>6,458,734</i>                                               | <i>4,651,962</i>                                                | <i>2,852,423</i>                                                | <i>1,194,626</i>                                                 |

**Supplementary Table 8 Predicted areas as suitable for relict species richness categories of genera having disjunct distributions between East Asia and other parts of the world.**

| Model                   | Total predicted area (km <sup>2</sup> ) for 1-128 relict species | Predicted area (km <sup>2</sup> ) for 1-5 relict species | Predicted area (km <sup>2</sup> ) for 6-10 relict species | Predicted area (km <sup>2</sup> ) for 11-20 relict species | Predicted area (km <sup>2</sup> ) for 21-50 relict species | Predicted area (km <sup>2</sup> ) for 51-128 relict species |
|-------------------------|------------------------------------------------------------------|----------------------------------------------------------|-----------------------------------------------------------|------------------------------------------------------------|------------------------------------------------------------|-------------------------------------------------------------|
| Present                 | 39,053,735                                                       | 20,917,095                                               | 8,850,149                                                 | 4,575,361                                                  | 4,372,861                                                  | 338,269                                                     |
| Mid-Holocene-CCSM       | 39,368,983                                                       | 21,459,269                                               | 8,888,251                                                 | 4,160,894                                                  | 4,611,016                                                  | 249,553                                                     |
| Mid-Holocene-MIROC      | 40,927,557                                                       | 22,632,276                                               | 8,244,619                                                 | 4,843,251                                                  | 4,803,309                                                  | 404,102                                                     |
| Mid-Holocene-MPI        | 40,239,145                                                       | 21,900,797                                               | 9,104,744                                                 | 4,291,171                                                  | 4,590,872                                                  | 351,561                                                     |
| <i>Average Holocene</i> | <i>40,178,562</i>                                                | <i>21,997,447</i>                                        | <i>8,745,871</i>                                          | <i>4,431,772</i>                                           | <i>4,668,399</i>                                           | <i>335,072</i>                                              |
| LGM-CCSM                | 50,996,842                                                       | 32,559,317                                               | 7,680,284                                                 | 6,601,852                                                  | 3,867,950                                                  | 287,439                                                     |
| LGM-MIROC               | 52,901,800                                                       | 36,202,305                                               | 6,169,412                                                 | 6,148,151                                                  | 4,305,456                                                  | 76,476                                                      |
| LGM-MPI                 | 59,816,001                                                       | 39,409,290                                               | 9,275,256                                                 | 6,327,552                                                  | 4,417,011                                                  | 386,892                                                     |
| <i>Average LGM</i>      | <i>54,571,548</i>                                                | <i>36,056,971</i>                                        | <i>7,708,317</i>                                          | <i>6,359,185</i>                                           | <i>4,196,806</i>                                           | <i>250,269</i>                                              |
| 2070-CCSM-RCP 2.6       | 40,281,157                                                       | 20,403,849                                               | 9,455,050                                                 | 5,719,214                                                  | 4,513,263                                                  | 189,781                                                     |
| 2070-CCSM-RCP 8.5       | 44,524,574                                                       | 22,841,233                                               | 9,378,157                                                 | 7,405,454                                                  | 4,763,090                                                  | 136,640                                                     |
| 2070-GFDL-RCP 2.6       | 45,642,122                                                       | 22,386,417                                               | 11,809,973                                                | 6,663,600                                                  | 4,714,227                                                  | 67,905                                                      |
| 2070-GFDL-RCP 8.5       | 47,681,840                                                       | 21,597,030                                               | 12,277,317                                                | 9,611,794                                                  | 4,173,121                                                  | 22,578                                                      |
| 2070-MPI-RCP 2.6        | 40,283,596                                                       | 20,676,154                                               | 9,322,918                                                 | 5,643,561                                                  | 4,449,212                                                  | 191,751                                                     |
| 2070-MPI-RCP 8.5        | 43,644,520                                                       | 22,511,641                                               | 9,105,272                                                 | 7,386,156                                                  | 4,601,767                                                  | 39,684                                                      |
| <i>Average 2070</i>     | <i>43,676,302</i>                                                | <i>21,736,054</i>                                        | <i>10,224,781</i>                                         | <i>7,071,630</i>                                           | <i>4,535,780</i>                                           | <i>108,057</i>                                              |

**Supplementary Table 9 Predicted overlapping suitable-areas for relict species richness categories of genera endemic to East Asia.**

| <b>Model</b>                | <b>Total predicted area (km<sup>2</sup>) for 1-85 relict species</b> | <b>Predicted area (km<sup>2</sup>) for 1-3 relict species</b> | <b>Predicted area (km<sup>2</sup>) for 4-8 relict species</b> | <b>Predicted area (km<sup>2</sup>) for 9-14 relict species</b> | <b>Predicted area (km<sup>2</sup>) for 15-25 relict species</b> | <b>Predicted area (km<sup>2</sup>) for 26-85 relict species</b> |
|-----------------------------|----------------------------------------------------------------------|---------------------------------------------------------------|---------------------------------------------------------------|----------------------------------------------------------------|-----------------------------------------------------------------|-----------------------------------------------------------------|
| Present-Past                | 14,194,353                                                           | 7,741,070                                                     | 3,061,877                                                     | 1,862,623                                                      | 1,010,684                                                       | 518,099                                                         |
| Present-Future RCP 2.6      | 33,286,395                                                           | 20,136,890                                                    | 6,309,587                                                     | 2,724,372                                                      | 1,863,053                                                       | 2,252,493                                                       |
| Present-Future RCP 8.5      | 29,253,686                                                           | 17,443,520                                                    | 6,556,242                                                     | 2,464,561                                                      | 1,749,121                                                       | 1,040,242                                                       |
| Present-Past-Future RCP 2.6 | 12,532,900                                                           | 6,963,832                                                     | 3,391,652                                                     | 1,325,251                                                      | 614,253                                                         | 237,912                                                         |
| Present-Past-Future RCP 8.5 | 11,244,631                                                           | 6,515,275                                                     | 3,463,941                                                     | 880,547                                                        | 332,335                                                         | 52,533                                                          |

**Supplementary Table 10 Predicted overlapping suitable-areas for relict species richness categories of genera having disjunct distributions between East Asia and other parts of the world.**

| <b>Model</b>                | <b>Total Predicted area (km<sup>2</sup>) for 1-85 relict species</b> | <b>Predicted area (km<sup>2</sup>) for 1-3 relict species</b> | <b>Predicted area (km<sup>2</sup>) for 4-8 relict species</b> | <b>Predicted area (km<sup>2</sup>) for 9-14 relict species</b> | <b>Predicted area (km<sup>2</sup>) for 15-25 relict species</b> | <b>Predicted area (km<sup>2</sup>) for 26-85 relict</b> |
|-----------------------------|----------------------------------------------------------------------|---------------------------------------------------------------|---------------------------------------------------------------|----------------------------------------------------------------|-----------------------------------------------------------------|---------------------------------------------------------|
| Present-Past                | 27,433,445                                                           | 18,149,628                                                    | 5,490,658                                                     | 2,041,459                                                      | 1,309,448                                                       | 442,252                                                 |
| Present-Future RCP 2.6      | 37,750,221                                                           | 17,191,443                                                    | 10,777,980                                                    | 5,013,568                                                      | 3,269,645                                                       | 1,497,585                                               |
| Present-Future RCP 8.5      | 35,863,169                                                           | 16,354,822                                                    | 11,594,503                                                    | 4,626,518                                                      | 2,690,419                                                       | 596,907                                                 |
| Present-Past-Future RCP 2.6 | 25,579,135                                                           | 17,027,627                                                    | 5,734,448                                                     | 1,743,255                                                      | 958,919                                                         | 114,886                                                 |
| Present-Past-Future RCP 8.5 | 23,083,330                                                           | 15,385,465                                                    | 5,776,515                                                     | 1,344,725                                                      | 569,164                                                         | 7,461                                                   |

**Supplementary Table 11 The predicted areas of the global stable-refugia for relict species richness (26-85) included within the network of Protected Areas (nature reserves) in China and northern Vietnam.**

|                                                                                    | Predicted area (km <sup>2</sup> ) for 26-85 relict species | Inside Protected Areas (km <sup>2</sup> and %) | Outside Protected Areas (km <sup>2</sup> and %) |
|------------------------------------------------------------------------------------|------------------------------------------------------------|------------------------------------------------|-------------------------------------------------|
| Present-Past-Future RCP 2.6 for relict species of endemic genera                   | 201,556                                                    | 41,142 (20.41)                                 | 160,414 (79.59)                                 |
| Present-Past-Future RCP 8.5 for relict species of endemic genera                   | 33,041                                                     | 6,407 (19.39)                                  | 26,634 (80.61)                                  |
| Intercontinental Present-Past-Future RCP 2.6 for relict species of disjunct genera | 68,325                                                     | 17,800 (26.05)                                 | 50,525 (73.95)                                  |
| Intercontinental Present-Past-Future RCP 8.5 for relict species of disjunct genera | 4,478                                                      | 1,243 (27.76)                                  | 3,235 (72.24)                                   |

### Supplementary References

1. Manchester, S. R., Chen, Z-D., Lu, A-M., Uemura, K. Eastern Asian endemic seed plant genera and their paleogeographic history throughout the Northern Hemisphere. *J. Syst. Evol.* **47**, 1–42 (2009).
2. Qian, H. A comparison of generic endemism of vascular plants between East Asia and North America. *Int. J. Plant Sci.* **162**, 191–199 (2001).
3. Kubitzki, K., Krutzsch, W. Origins of East and South East Asian plant diversity. In *Floristic Characteristics and Diversity of East Asian Plants* (eds. Zhang, A. & Wu, S.) 56-70 (Beijing, China: China Higher Education Press, 1996).
4. An, Z., Kutzbach, J. E., Prell, W. L. & Porter, S. C. Evolution of Asian monsoons and phased uplift of the Himalaya–Tibetan plateau since Late Miocene times. *Nature*, **411**, 62–66 (2001).
5. Liu, X. *et al.* Continental drift and plateau uplift control origination and evolution of Asian and Australian monsoons. *Sci. Rep.* **7**, 40344; doi: 10.1038/srep40344 (2017).
6. Ramstein, G., Fluteau, F., Besse, J. & Joussaume, S. Effect of orogeny, plate motion and land-sea distribution on Eurasian climate change over the past 30 million years. *Nature* **386**, 788–795 (1997).
7. van der Hammen, T., Wijmstra, T. A. & Zagwijn, W. H. The floral record of the Late Cenozoic of Europe. In *Late Cenozoic Glacial Ages* (ed. Turekian, K. K.) 391-424 (Yale University Press, New Haven, 1971).
8. Martinetto, E. *et al.* Late persistence and deterministic extinction of "humid thermophilous plant taxa of East Asian affinity" (HUTEA) in southern Europe. *Palaeogeogr. Palaeoclimatol. Palaeoecol.* **467**, 211-231 (2017).
9. Chen, F., Wünnemann, B. & Yu, Z. Holocene climate variability in arid Asia: nature and mechanisms. *Quat. Int.* **194**, 1–5 (2009).
10. Ramankutty, N. & Foley, J. A. Estimating historical changes in global land cover: Croplands from 1700 to 1992. *Global Biogeochem. Cycles* **13**, 997–1027 (1999).
