# Supplementary material for: Identifying long-term stable refugia for relict plant species in East Asia
Source: PubMed Central journal article supplement (PMC6203703; doi:10.1038/s41467-018-06837-3), 2018-10-26
Supplement: 41467_2018_6837_MOESM3_ESM.pdf [file 41467_2018_6837_MOESM3_ESM.pdf]

## **Description of Additional Supplementary Files**

File Name: Supplementary Data 1

Description: Relict species of genera endemic to East Asia

File Name: Supplementary Data 2

Description: Relict species of genera with disjunct distributions between East Asia and other parts of the world.

File Name: Supplementary Data 3

Description: Forest types containing relict species in East Asia, at least one of them being a dominant

File Name: Supplementary Data 4

Description: Herbaria, websites and literature for relict species' current distribution information
